# Supplementary material
Source: ML conference proceedings conference paper supplement (https://openreview.net/forum?id=O4nISWGU4F)
Supplement: supplementary_material [file Fig3_test1_gen_level_2.pdf › qLLM_depression-main/figures/fig3/Fig3_test1_gen_level_2.pdf]

**A**

Subject item score pairwise correlations

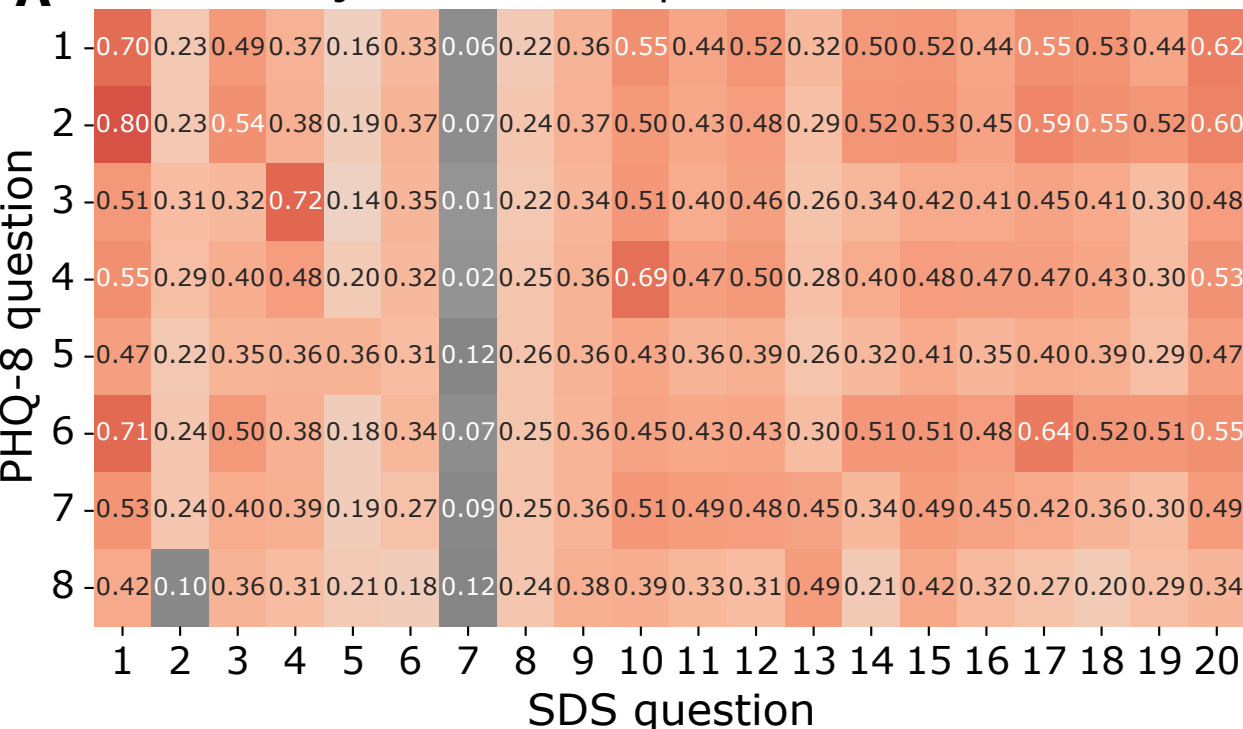**B**

LLM vs subject item score correlations

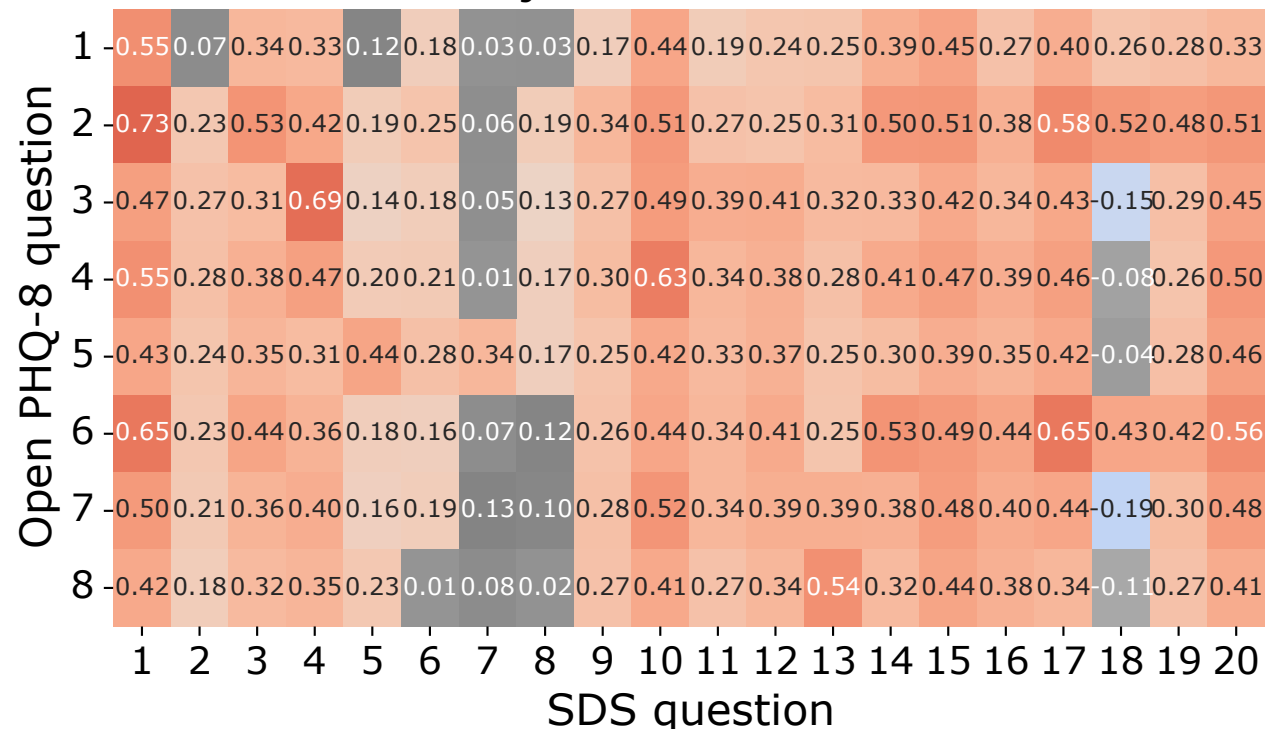**C**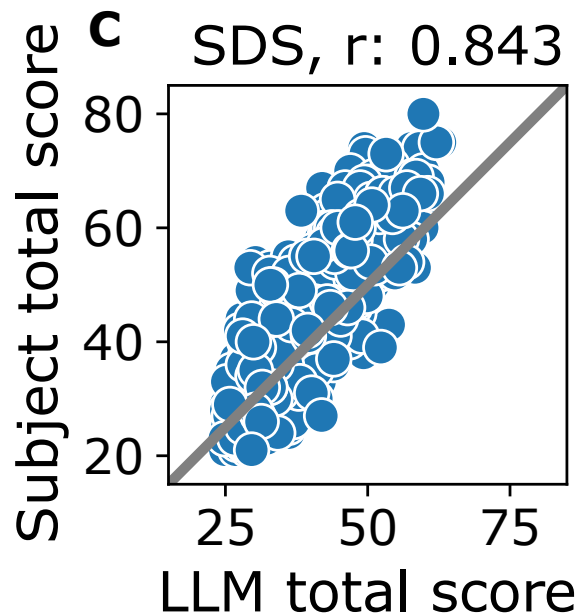**D**

Average cov item difference

| Model     | Questionnaire |      |      |      |
|-----------|---------------|------|------|------|
|           | SDS           | PHQ9 | GAD7 |      |
|           | Gemma2_9B     | 0.03 | 0.09 | 0.03 |
|           | MistralOO_7B  | 0.07 | 0.11 | 0.06 |
|           | Gemma2_2B     | 0.12 | 0.15 | 0.09 |
|           | LLama3_8B     | 0.21 | 0.47 | 0.26 |
| LLama3_3B | 0.26          | 0.46 | 0.28 |      |

**E**

Totals correlations

| Questionnaire | Questionnaire |      |      |
|---------------|---------------|------|------|
|               | SDS           | PHQ9 | GAD7 |
|               | 0.84          | 0.87 | 0.76 |
|               | 0.83          | 0.86 | 0.76 |
|               | 0.83          | 0.79 | 0.68 |
| 0.75          | 0.55          | 0.66 |      |
| 0.14          | 0.51          | 0.66 |      |
