# Supplementary material
Source: ML conference proceedings conference paper supplement (https://openreview.net/forum?id=O4nISWGU4F)

# Expected score difference after perturbation: Gemma2\_9B

Negative perturbation strength: -0.25

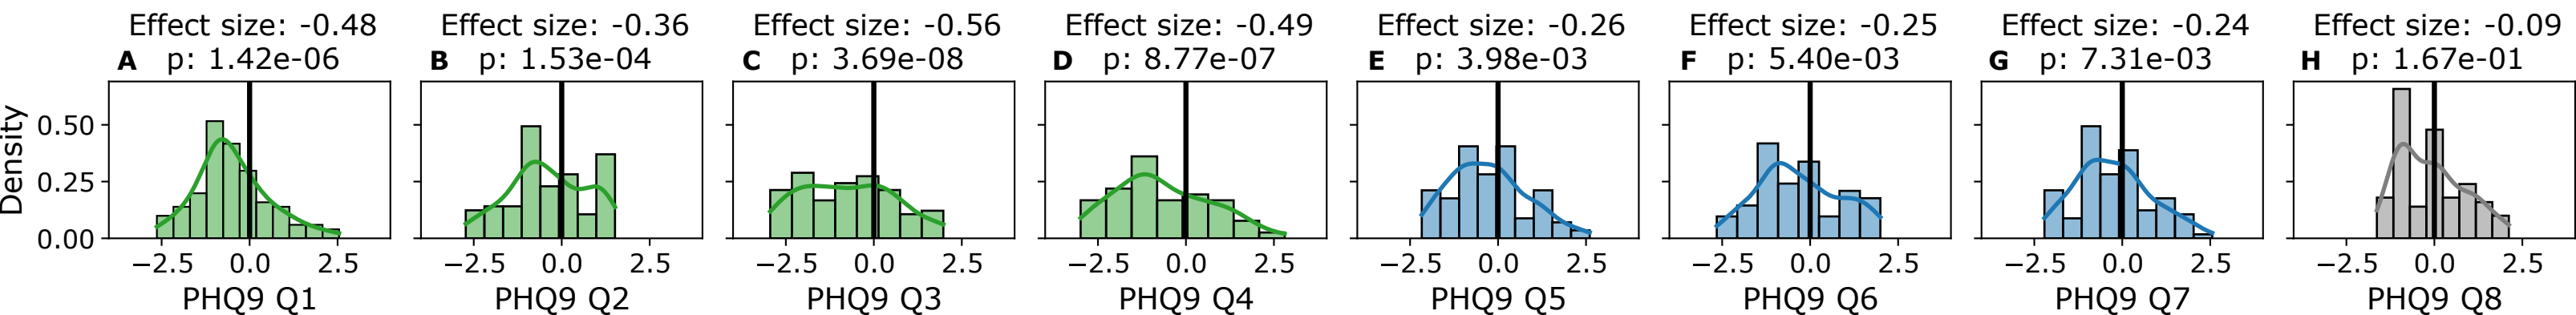

Positive perturbation strength: 1.5

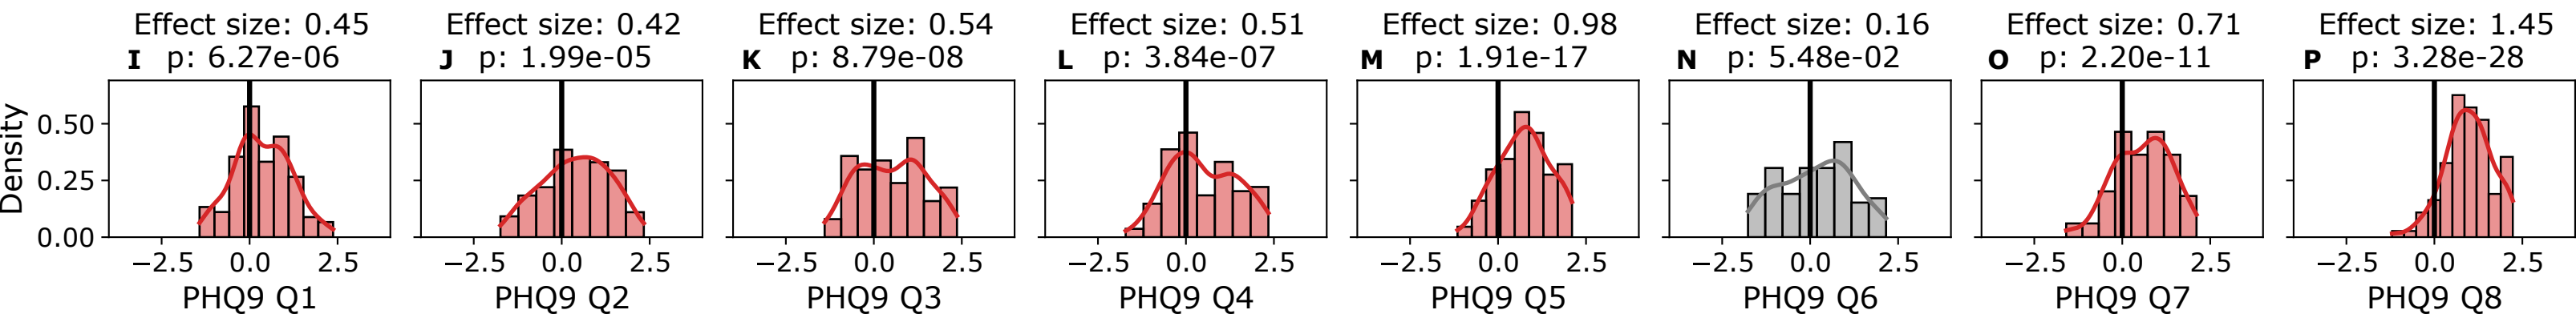

Supplement: supplementary_material [file Fig5_test2_logits_perturbation.pdf › qLLM_depression-main/figures/fig5/Fig5_test2_logits_perturbation.pdf]
