# Supplementary material
Source: ML conference proceedings conference paper supplement (https://openreview.net/forum?id=O4nISWGU4F)

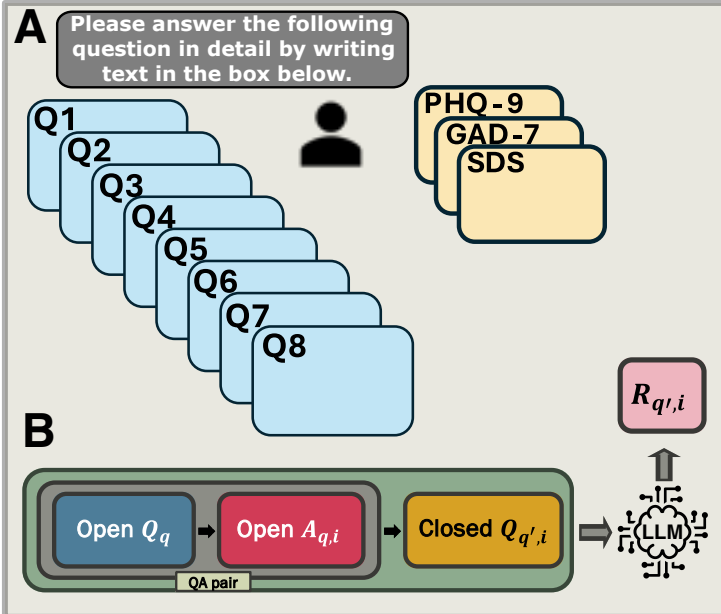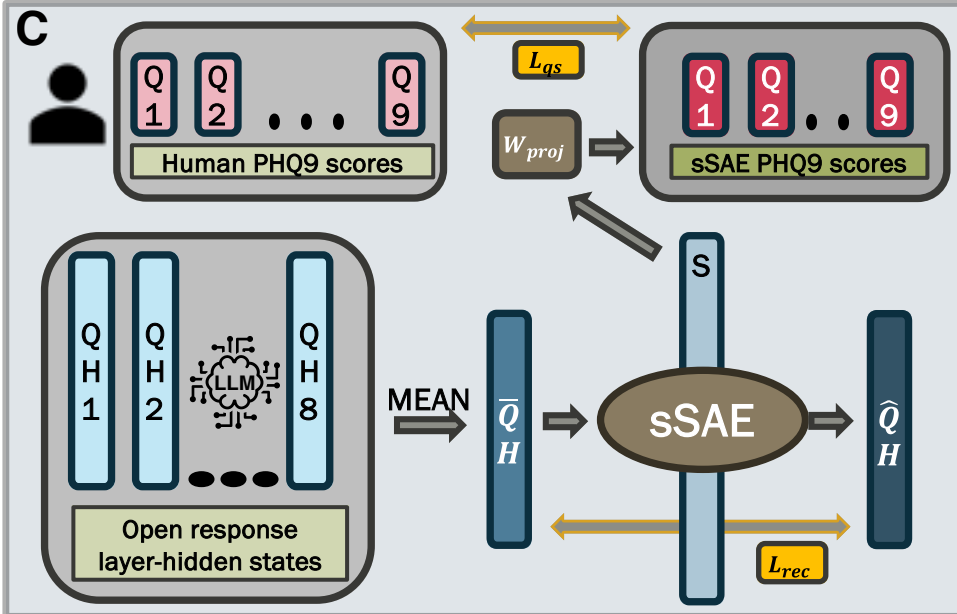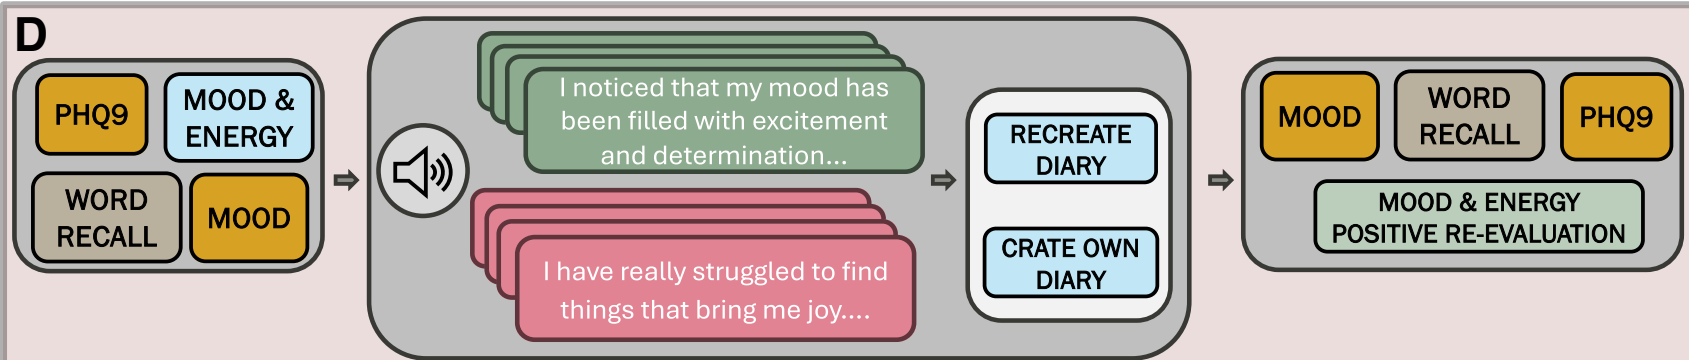

Supplement: supplementary_material [file Fig1_design.pdf › qLLM_depression-main/figures/fig1/Fig1_design.pdf]

# Gemma2\_9B

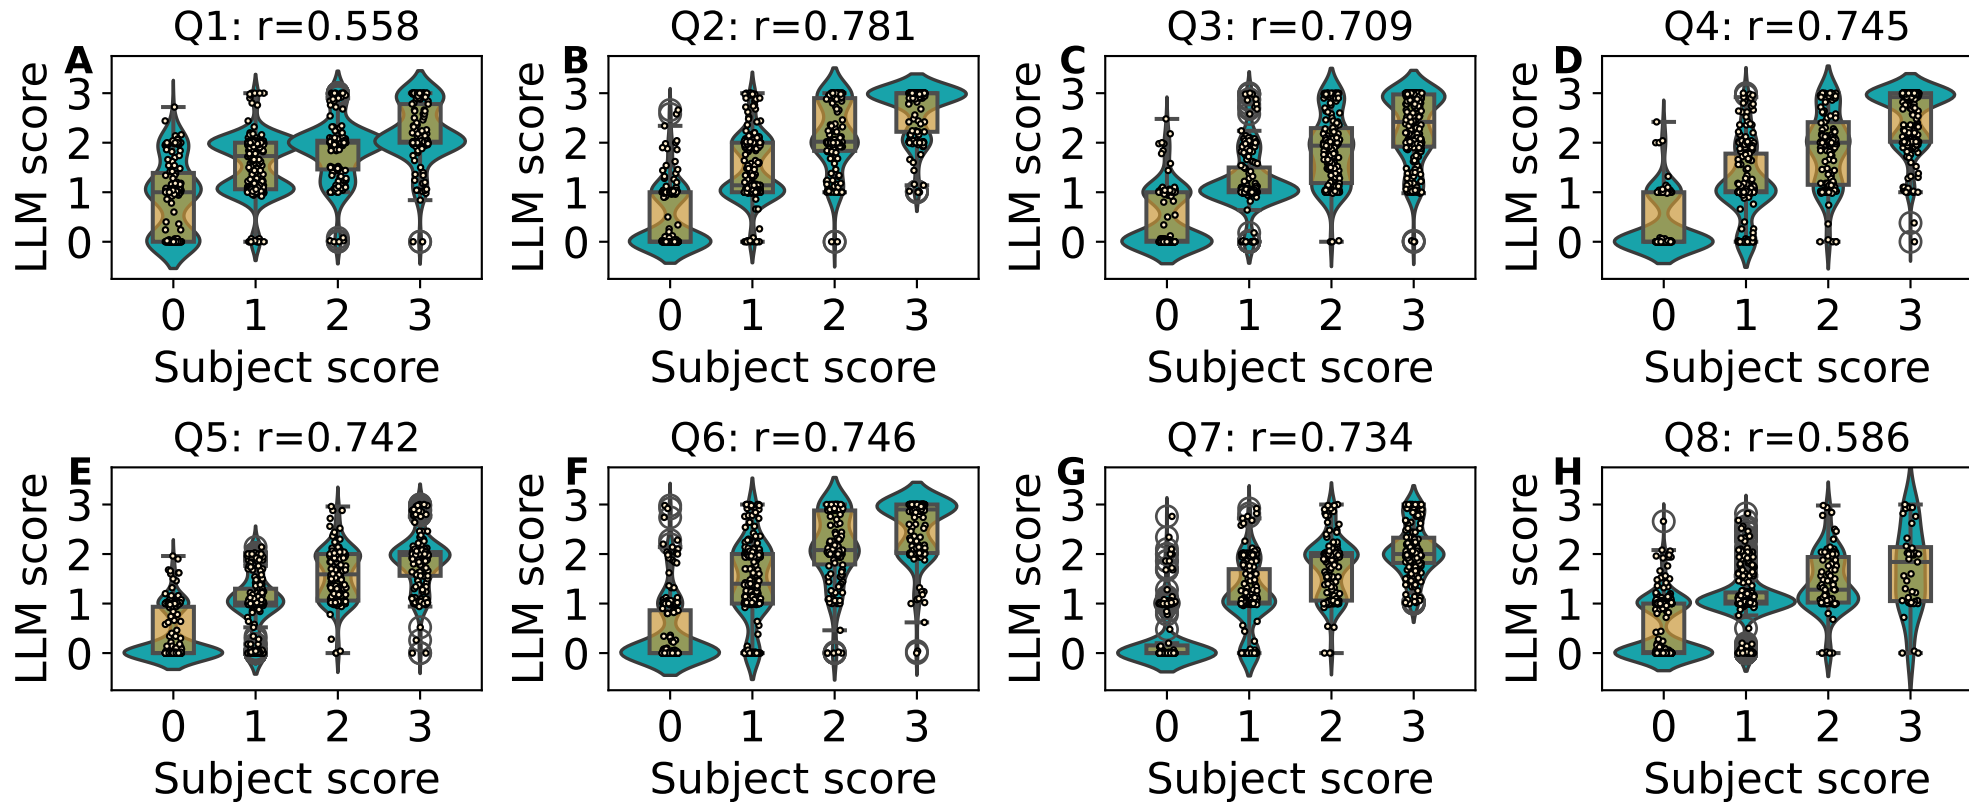

Supplement: supplementary_material [file Fig2_p1_test1_item_level.pdf › qLLM_depression-main/figures/fig2/Fig2_p1_test1_item_level.pdf]

**A**

## Item-level Correlations

Model

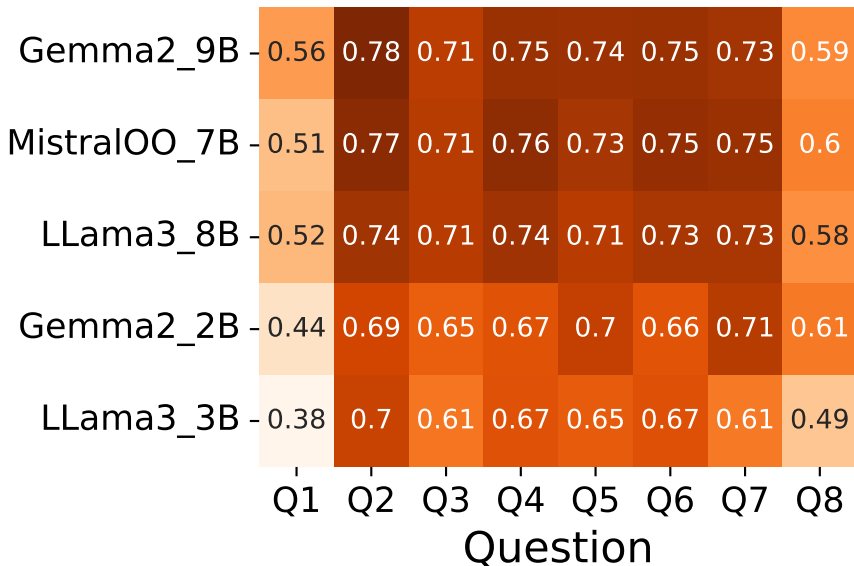

Supplement: supplementary_material [file Fig2_p2_test1_item_level.pdf › qLLM_depression-main/figures/fig2/Fig2_p2_test1_item_level.pdf]

Gemma2\_9B

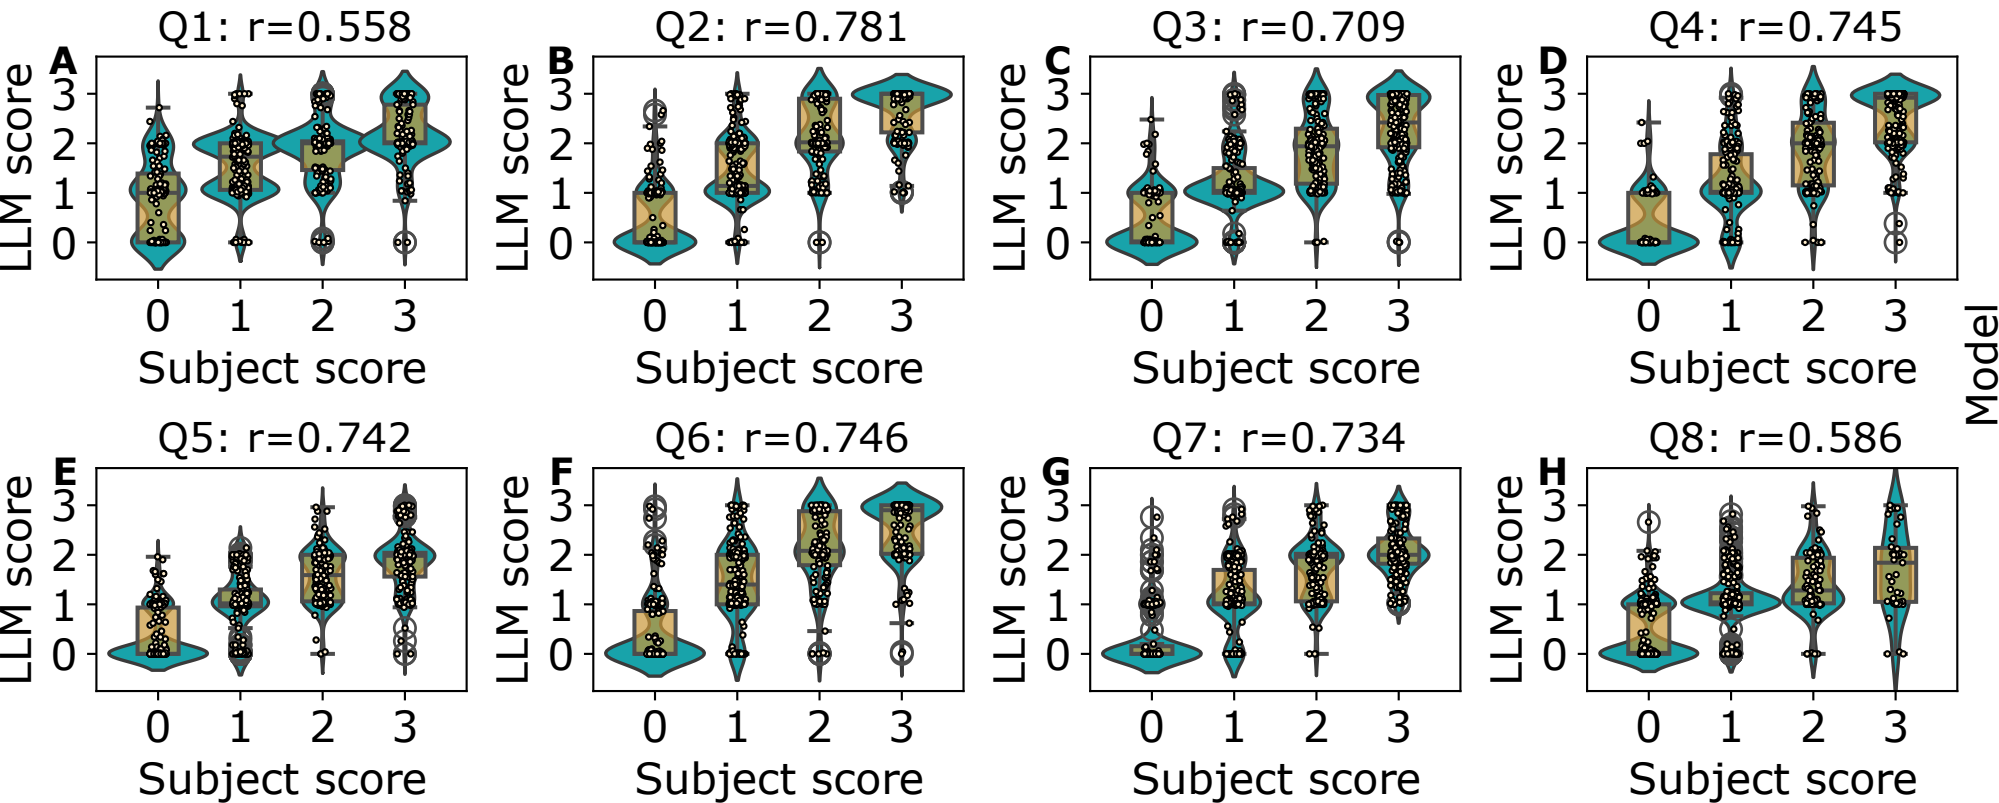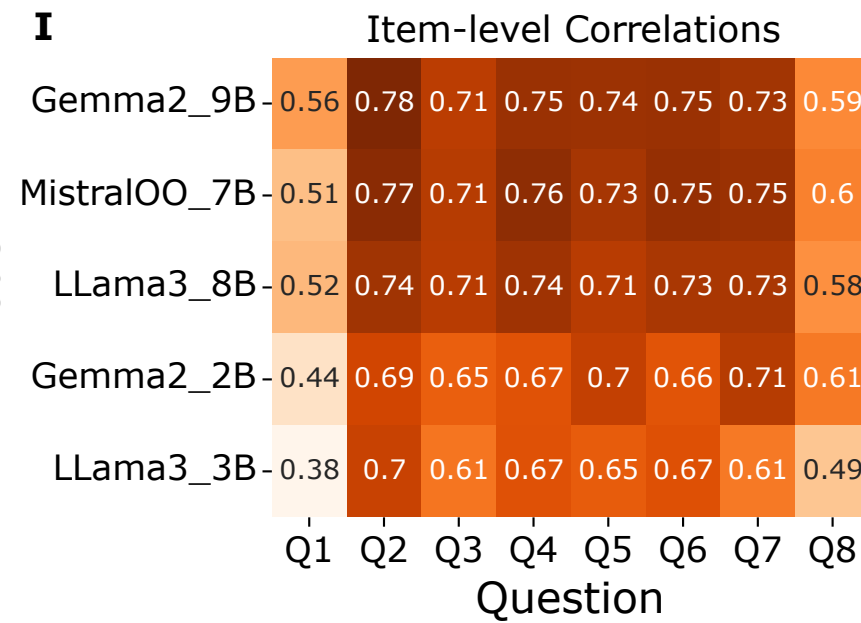

Supplement: supplementary_material [file Fig2_test1_item_level.pdf › qLLM_depression-main/figures/fig2/Fig2_test1_item_level.pdf]

# Gemma2\_9B

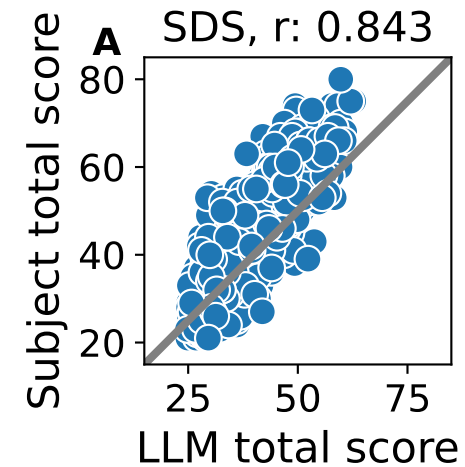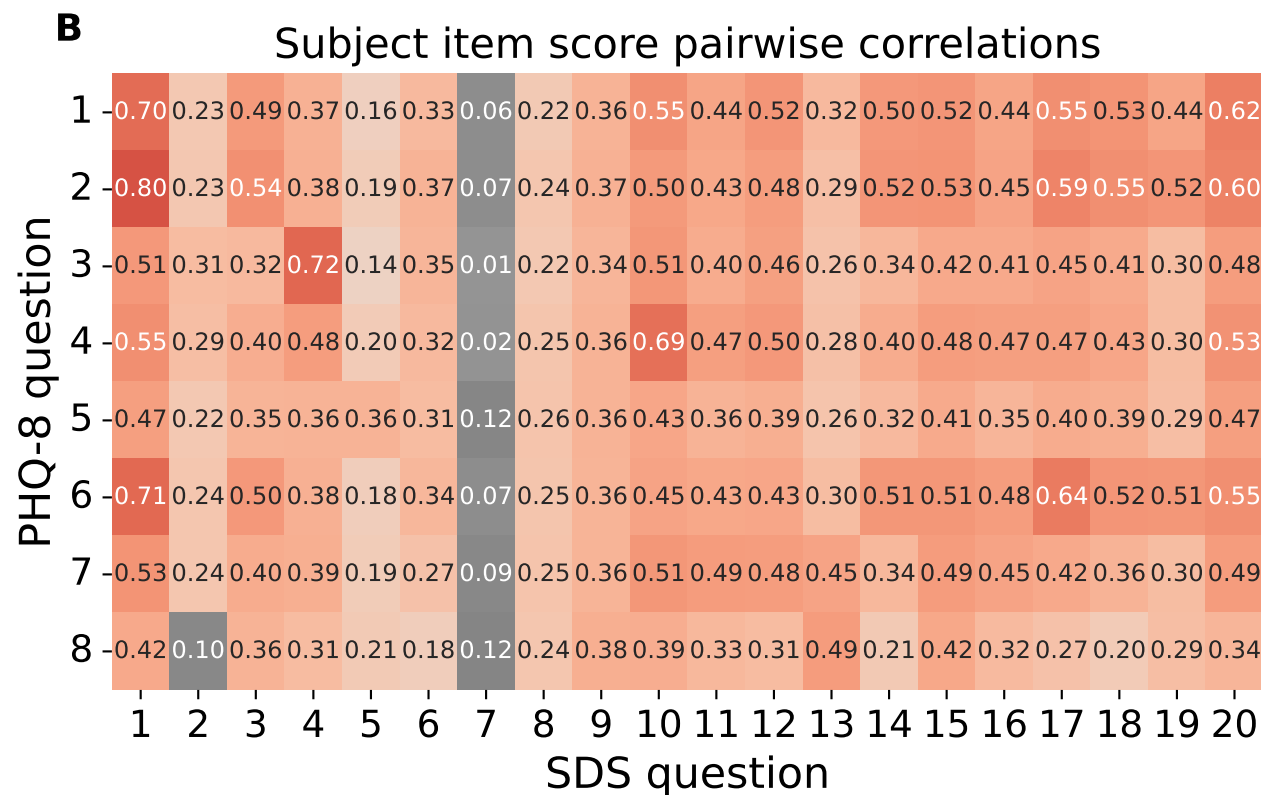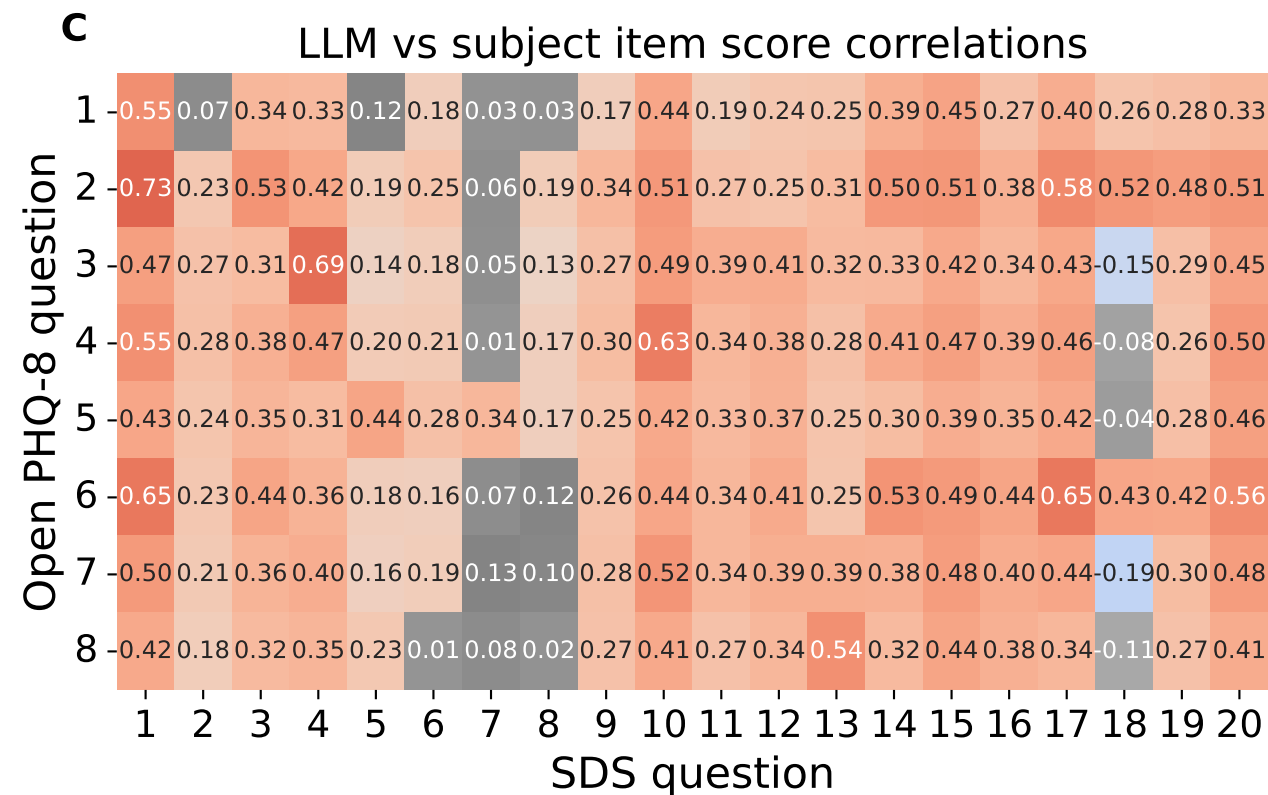

Supplement: supplementary_material [file Fig3_p1_test1_gen_level.pdf › qLLM_depression-main/figures/fig3/Fig3_p1_test1_gen_level.pdf]

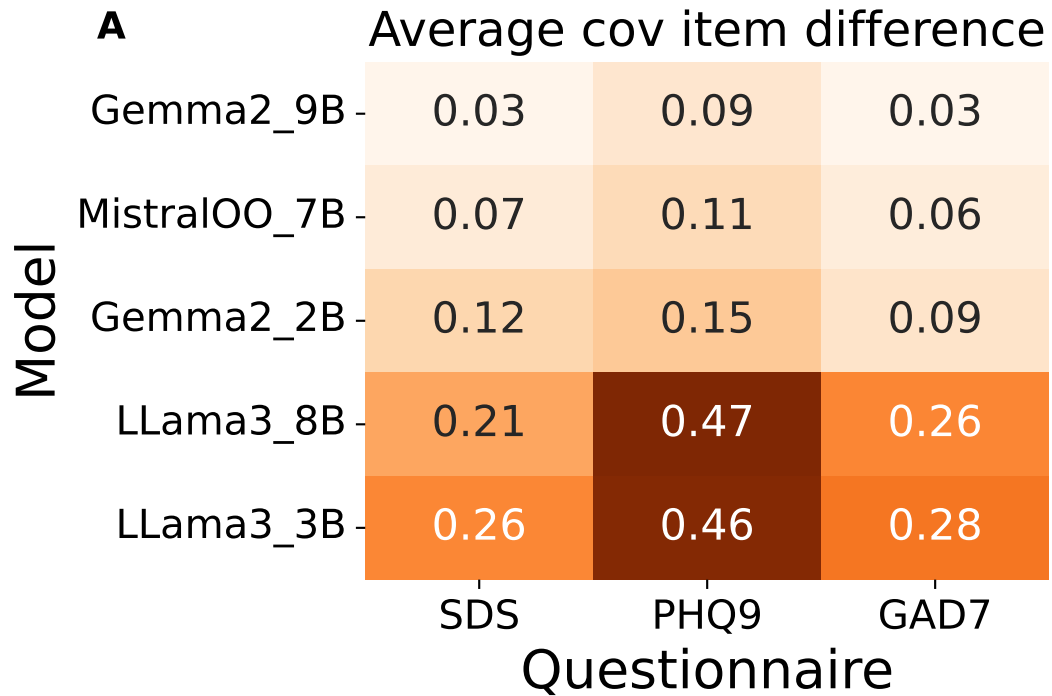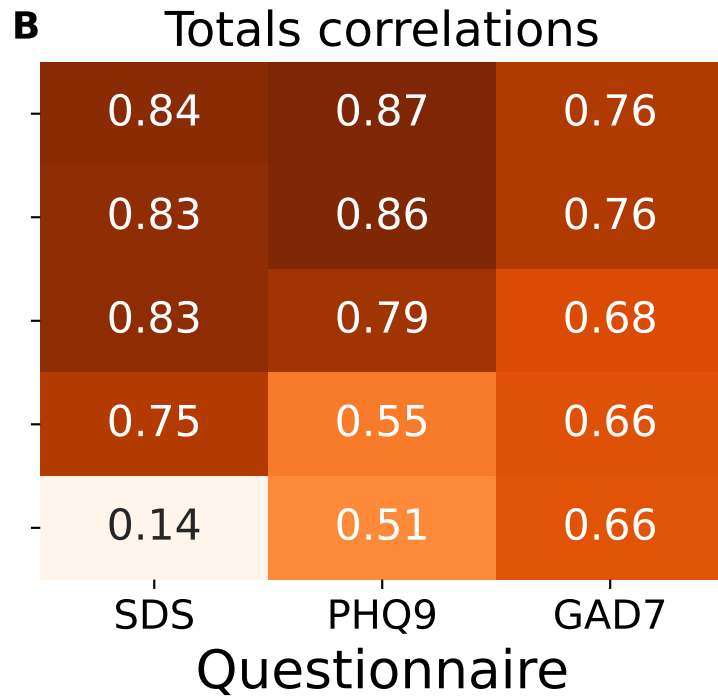

Supplement: supplementary_material [file Fig3_p2_test1_gen_level.pdf › qLLM_depression-main/figures/fig3/Fig3_p2_test1_gen_level.pdf]

# Gemma2\_9B

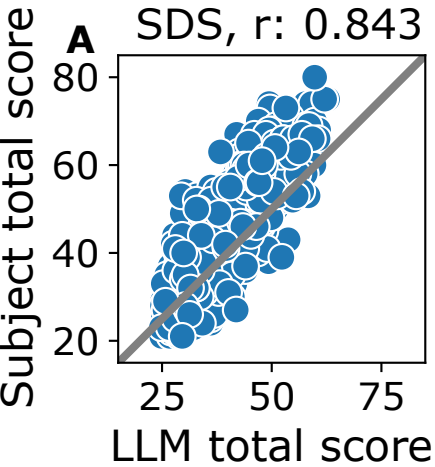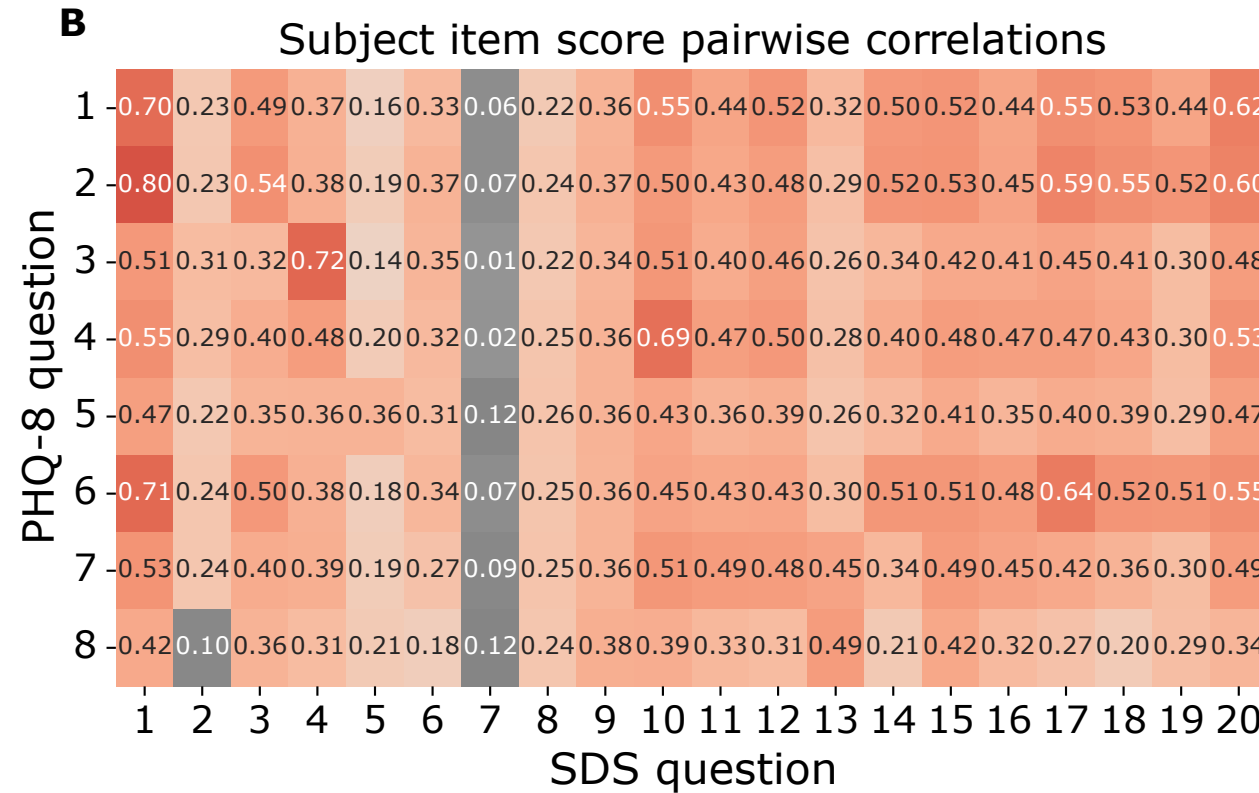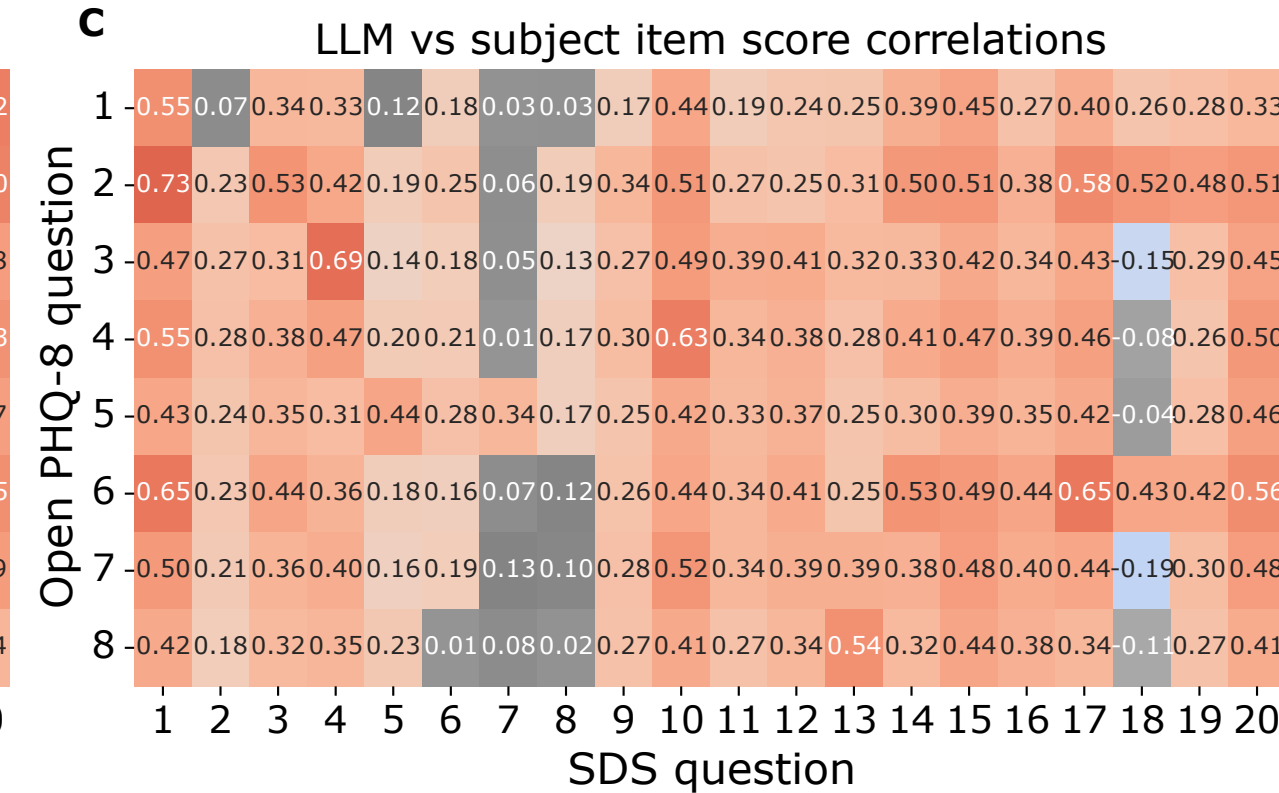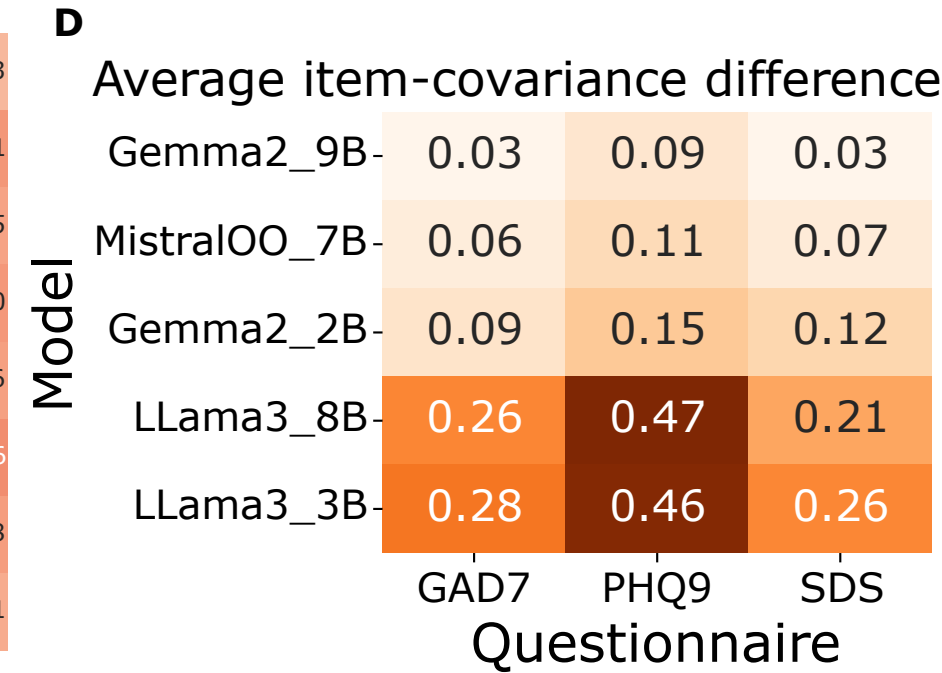

Supplement: supplementary_material [file Fig3_test1_gen_level.pdf › qLLM_depression-main/figures/fig3/Fig3_test1_gen_level.pdf]

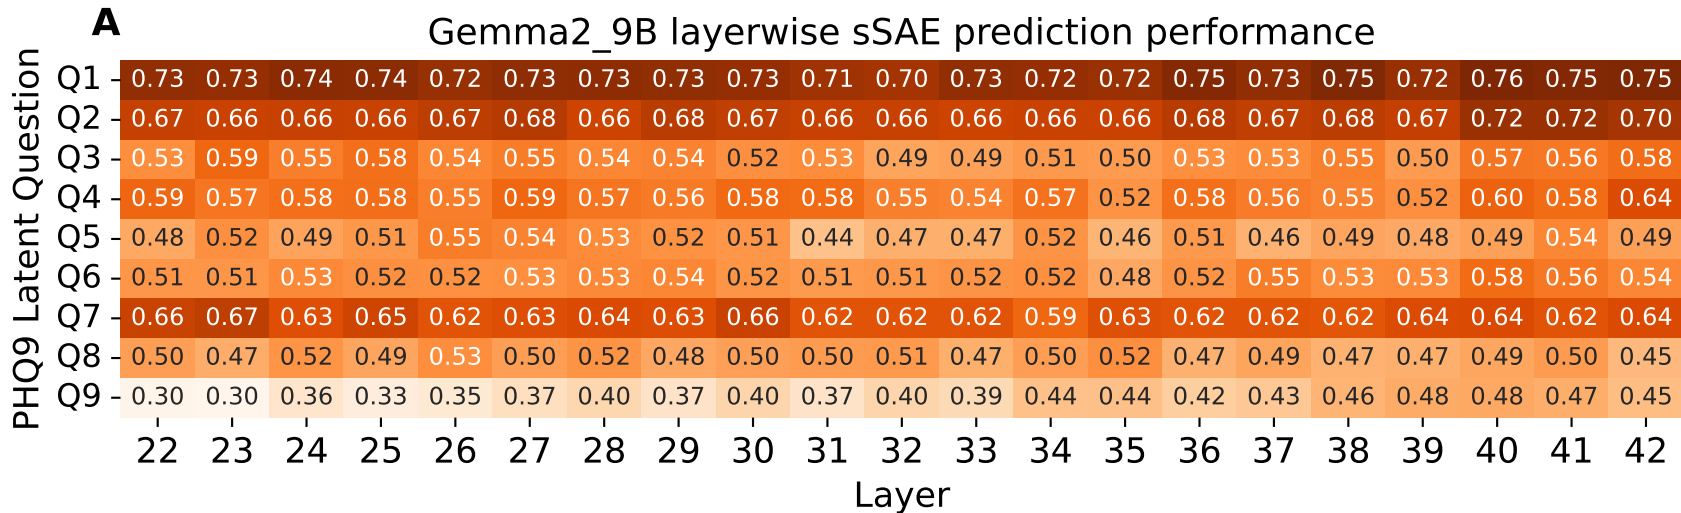

Supplement: supplementary_material [file Fig4_p1_ssae_training_performance_gemma-2-9b-it.pdf › qLLM_depression-main/figures/fig4/Fig4_p1_ssae_training_performance_gemma-2-9b-it.pdf]

# Gemma2\_9B best layer sSAE score predictions

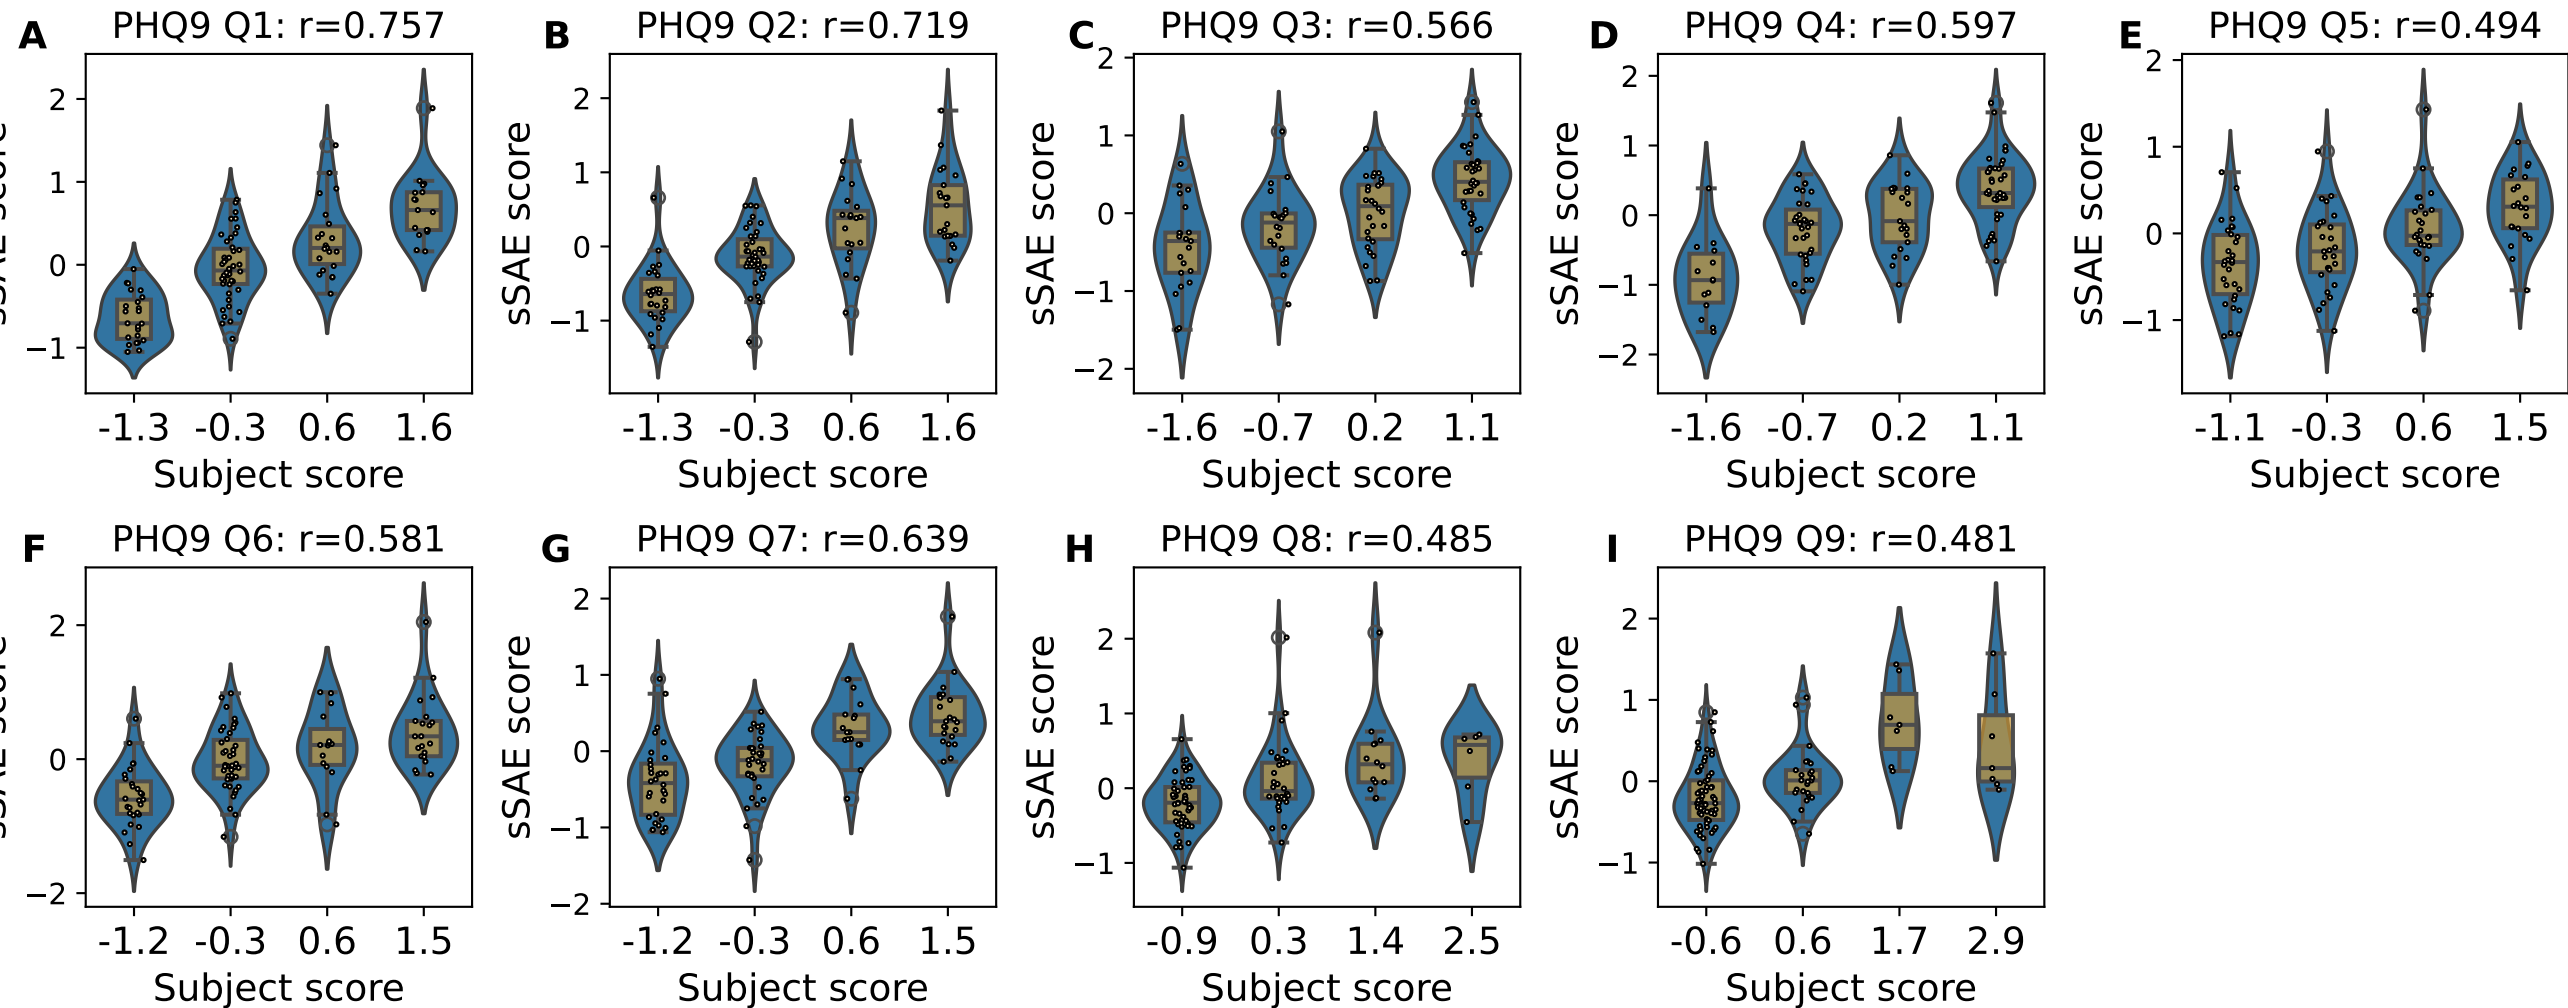

Supplement: supplementary_material [file Fig4_p2_ssae_bestlayer_performance_gemma-2-9b-it.pdf › qLLM_depression-main/figures/fig4/Fig4_p2_ssae_bestlayer_performance_gemma-2-9b-it.pdf]

## A Perturbation confusion matrix

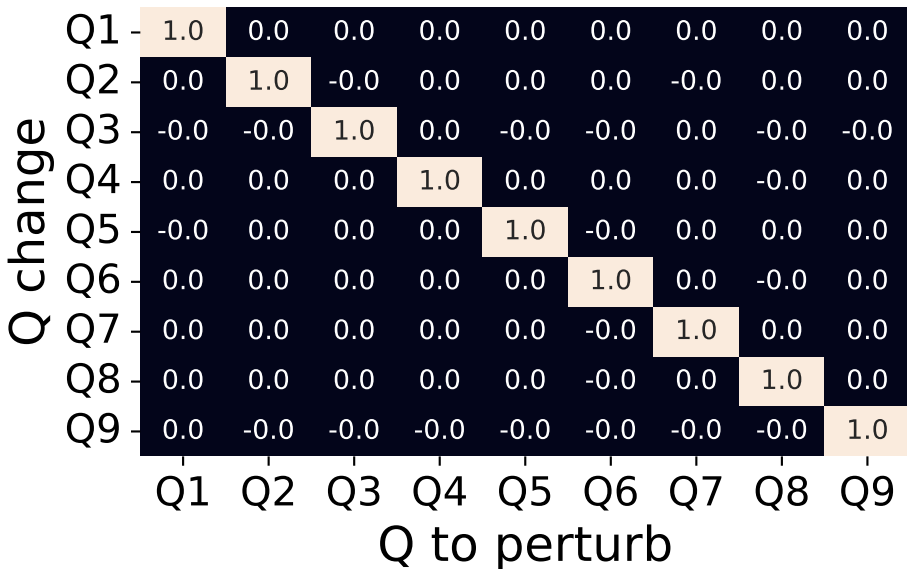

Supplement: supplementary_material [file Fig4_p3_test2_latent_perturbation.pdf › qLLM_depression-main/figures/fig4/Fig4_p3_test2_latent_perturbation.pdf]

# Gemma2\_9B best layer sSAE score predictions

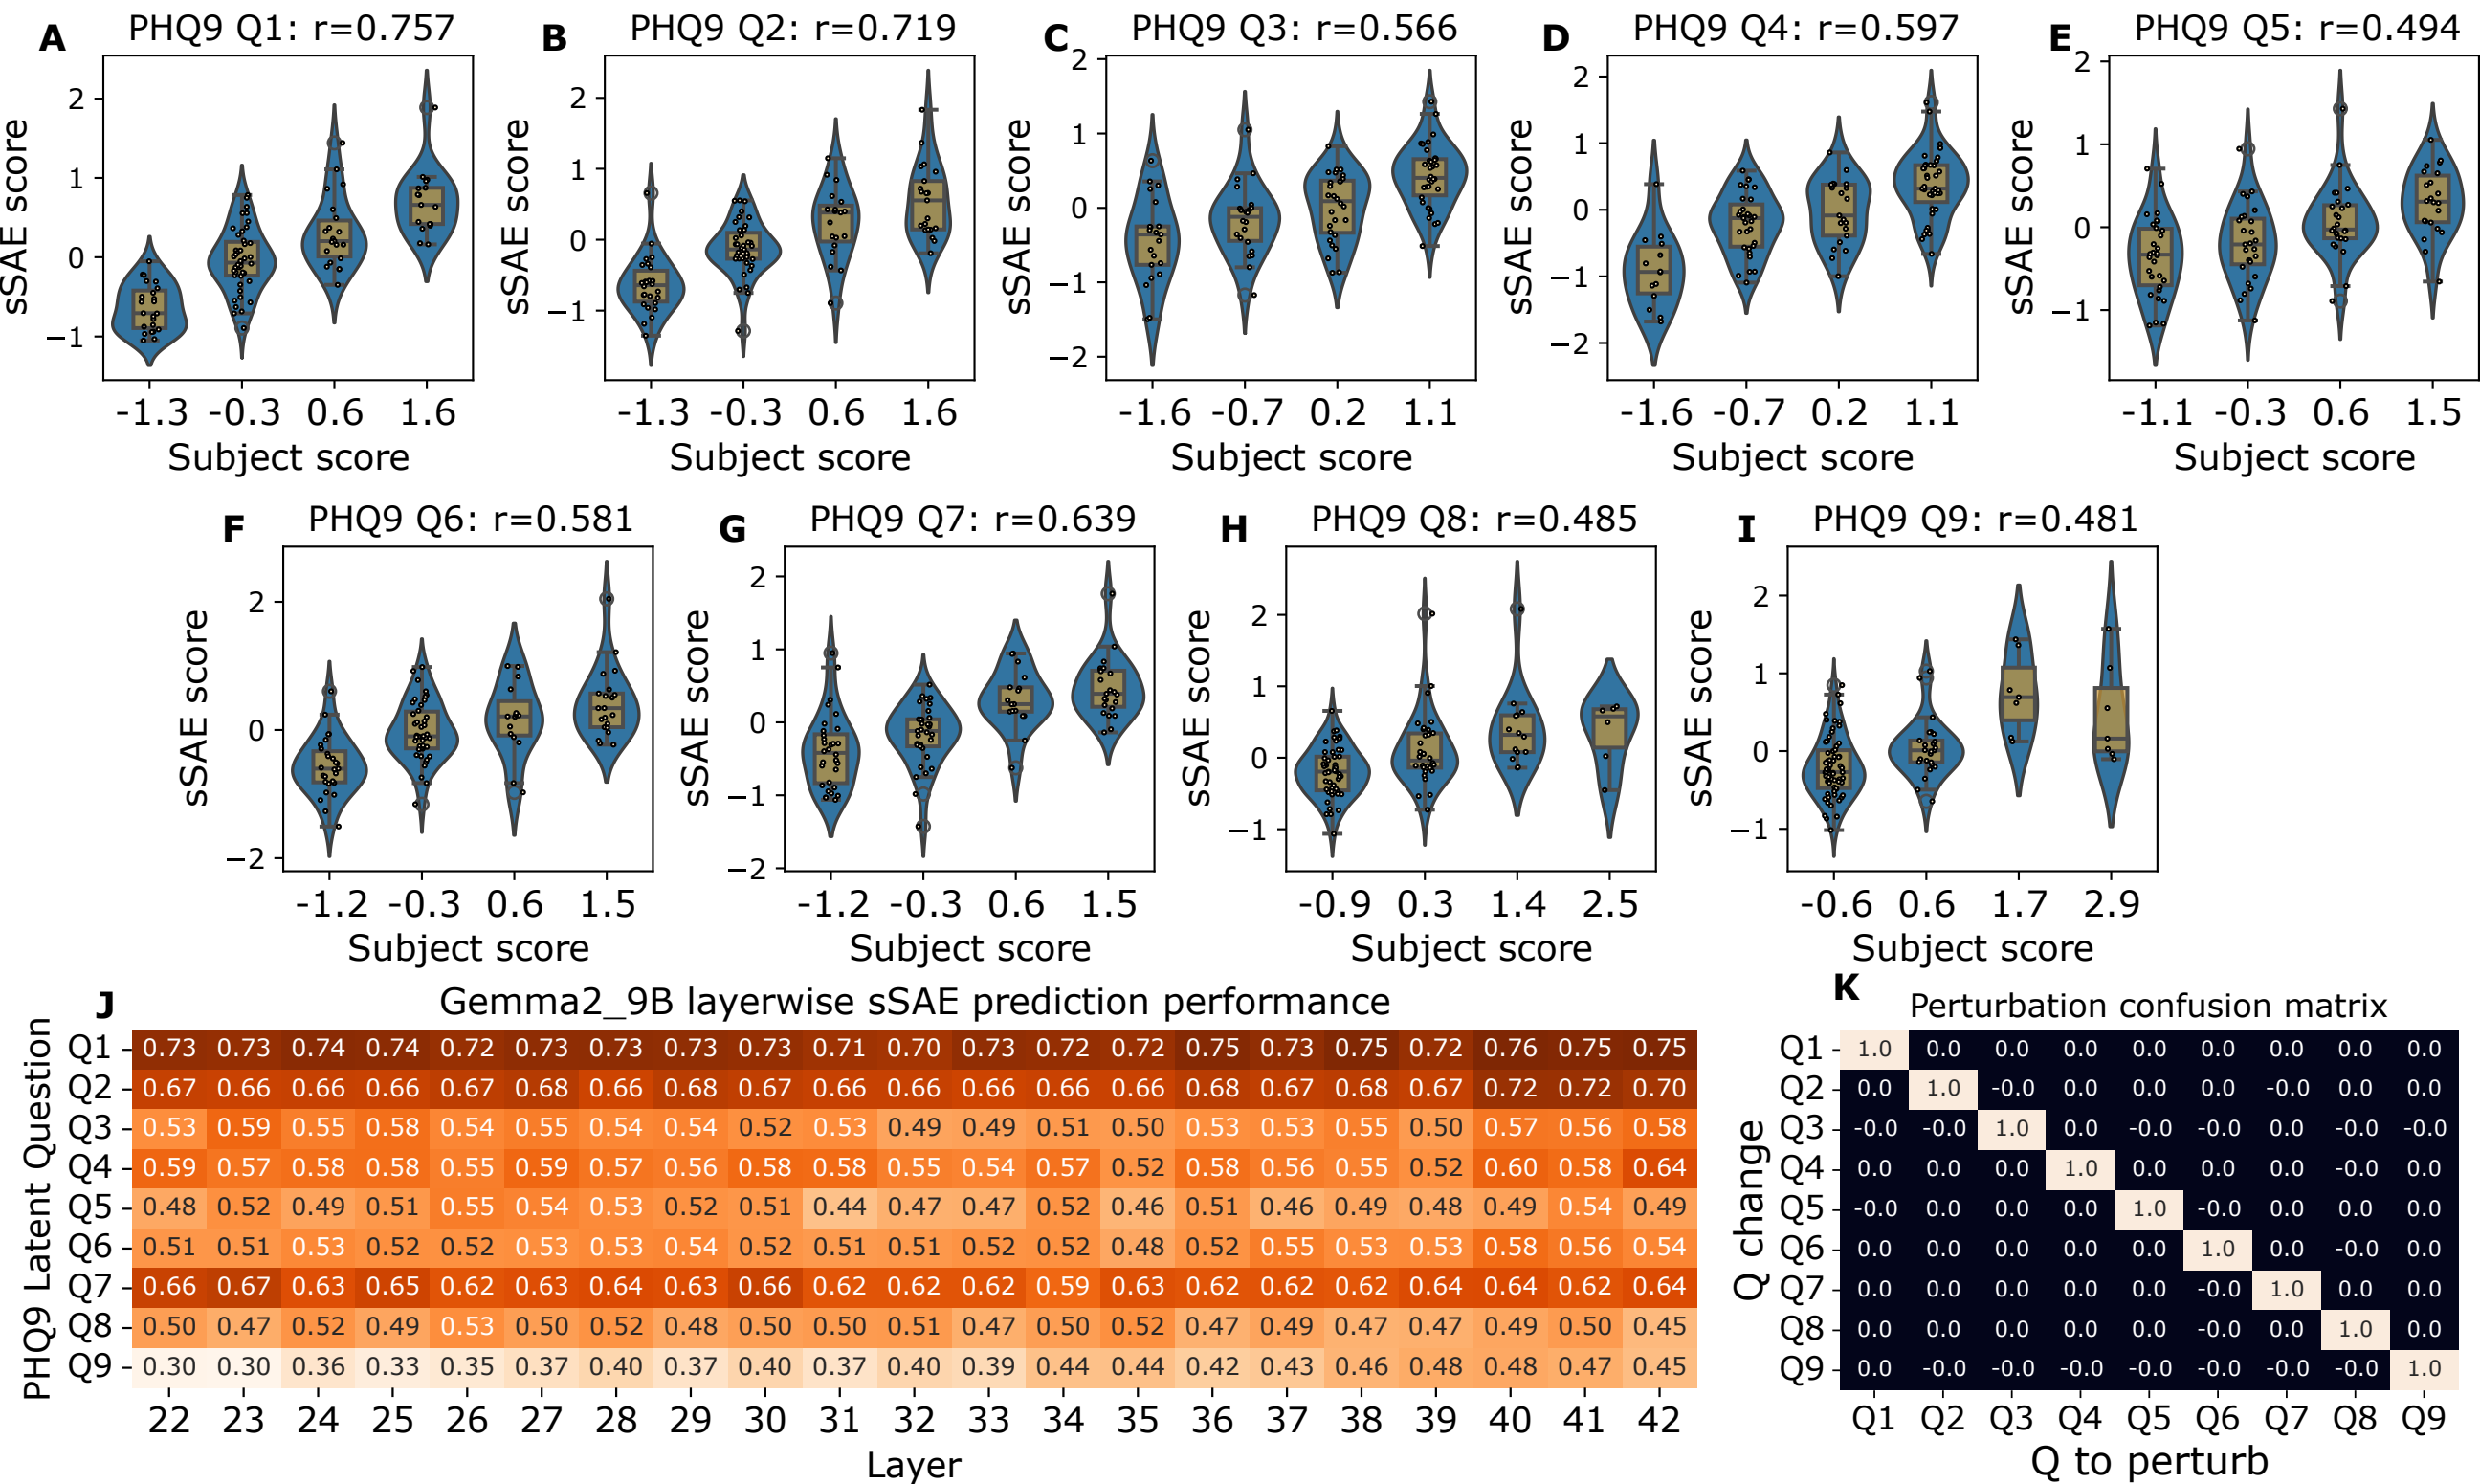

Supplement: supplementary_material [file Fig4_test2.pdf › qLLM_depression-main/figures/fig4/Fig4_test2.pdf]

**A**

# Affective change measures

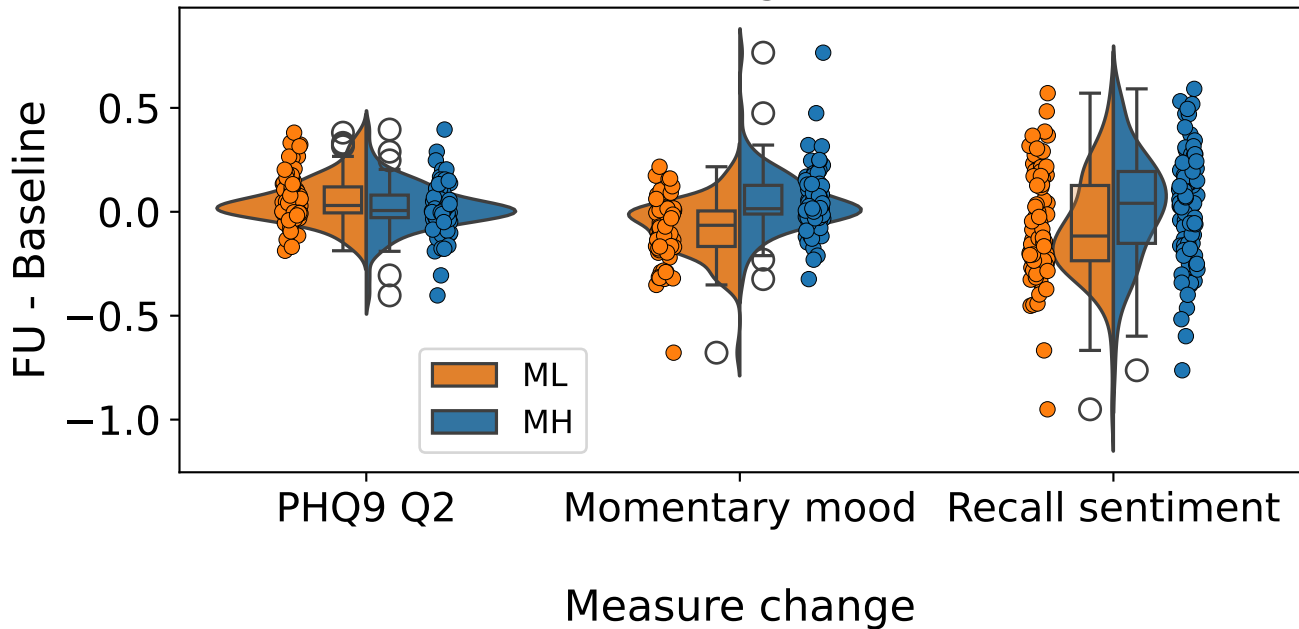

Supplement: supplementary_material [file Fig6_p1_test3_mood_induction_measures.pdf › qLLM_depression-main/figures/fig6/Fig6_p1_test3_mood_induction_measures.pdf]

**A**  
SAE Q2 Score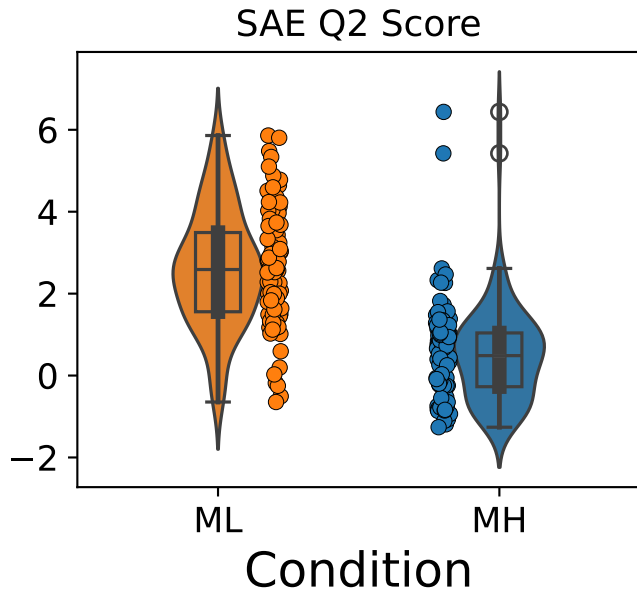**B**  
FU-Baseline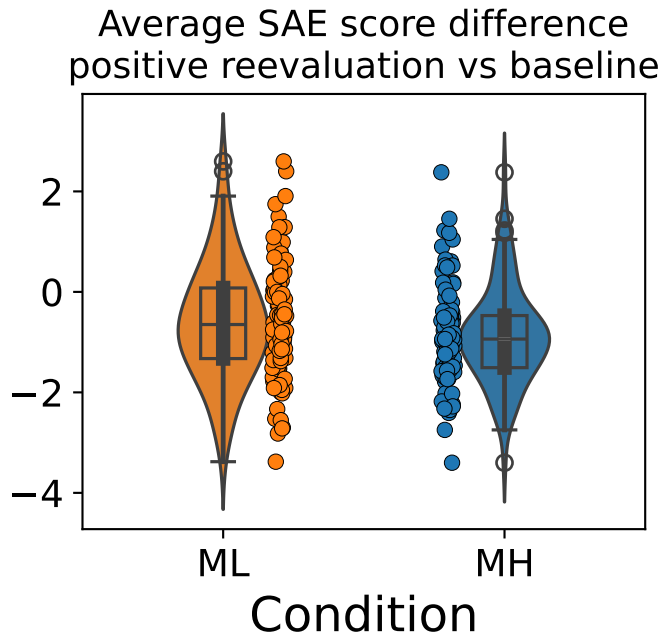

Supplement: supplementary_material [file Fig6_p2_test3_mood_induction_sae-measures.pdf › qLLM_depression-main/figures/fig6/Fig6_p2_test3_mood_induction_sae-measures.pdf]

Affective change measures (FU - Baseline) vs SAE Q2 score

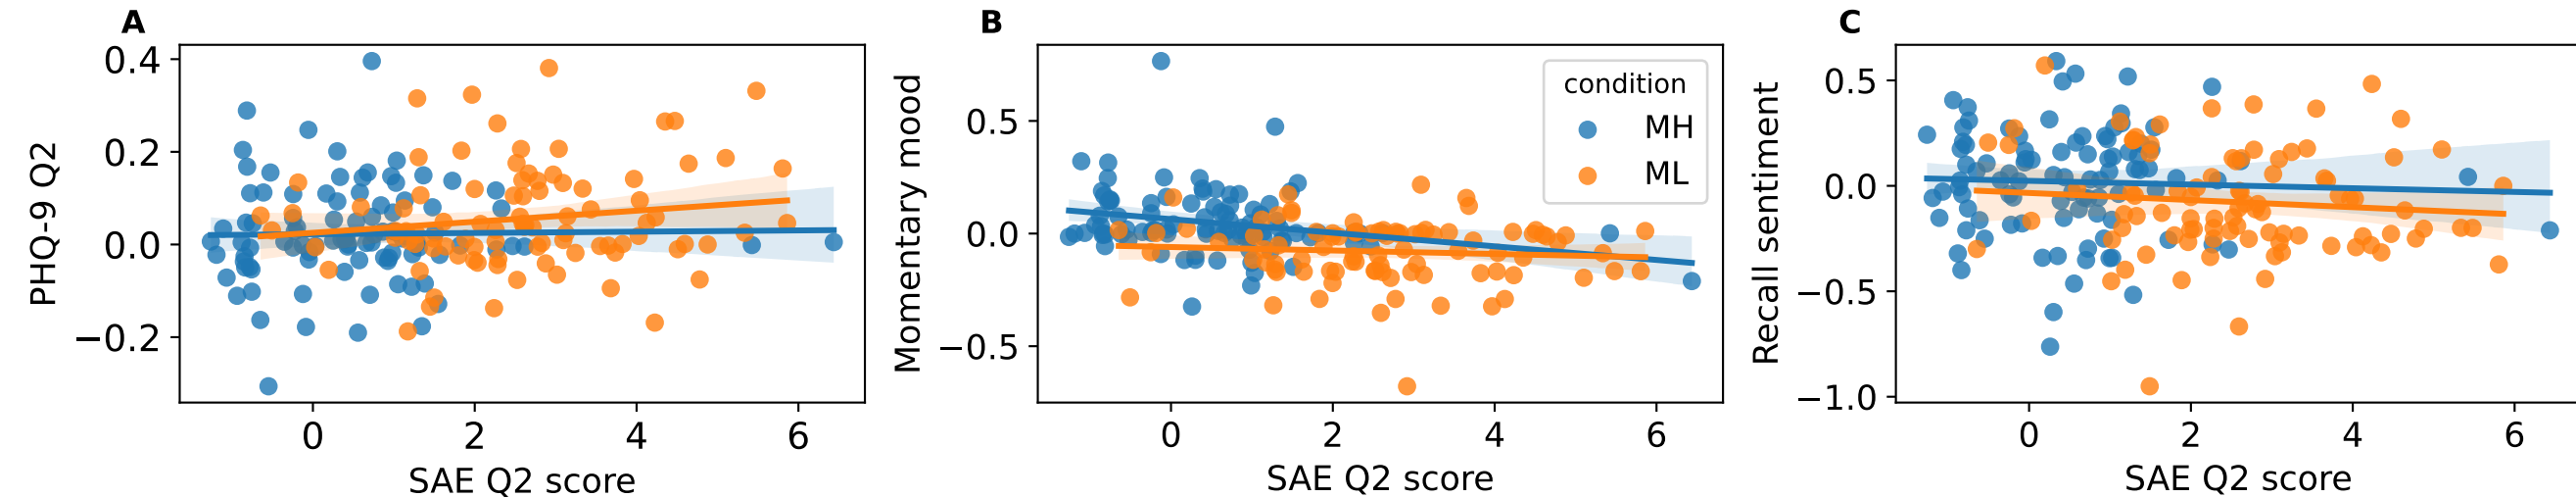

Supplement: supplementary_material [file Fig6_p3_test3_mood_induction_measures-vs_sae.pdf › qLLM_depression-main/figures/fig6/Fig6_p3_test3_mood_induction_measures-vs_sae.pdf]

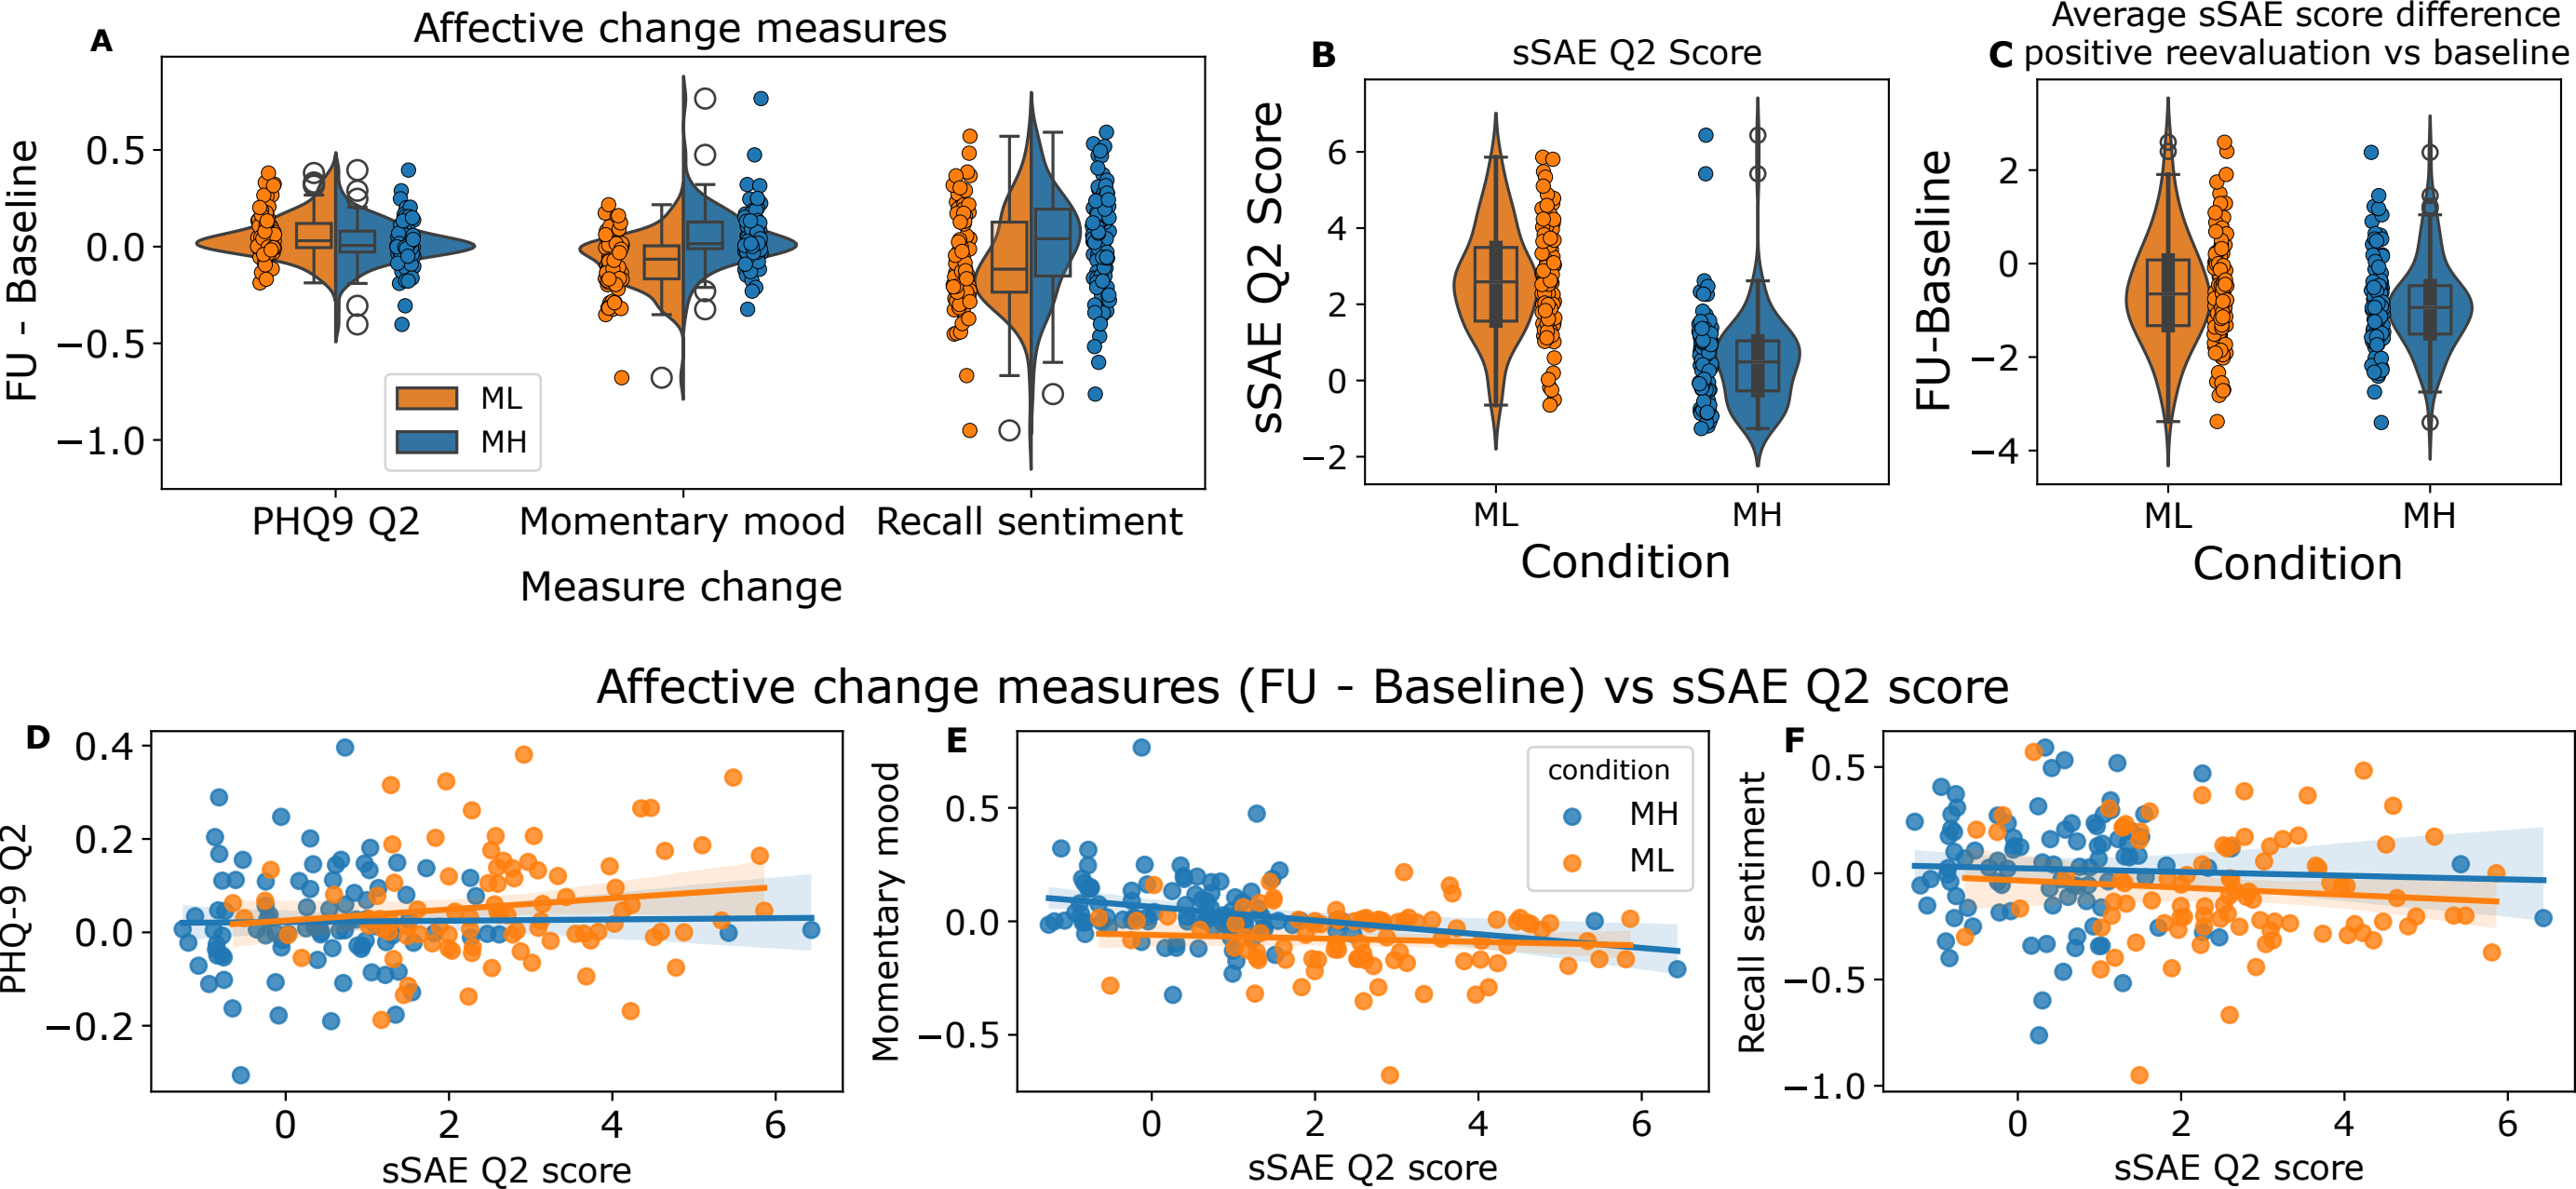

Supplement: supplementary_material [file Fig6_test3_mood_induction.pdf › qLLM_depression-main/figures/fig6/Fig6_test3_mood_induction.pdf]
